# Supplementary material
Source: Springer Nature journal article supplement (https://www.springermedizin.de/resource/supplementary/12974_2008_134_MOESM3_ESM.pdf/9600846)

**A**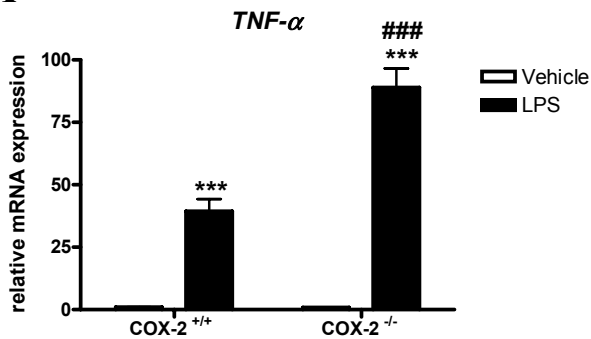**B**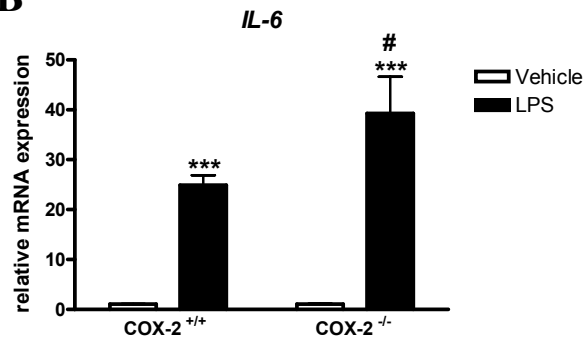**C**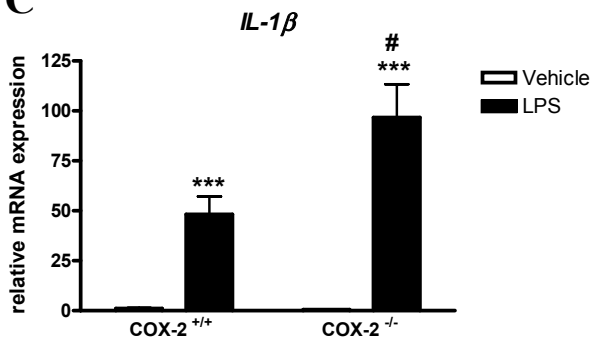**D**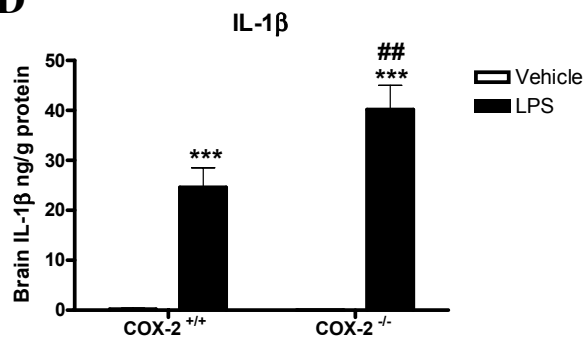**E**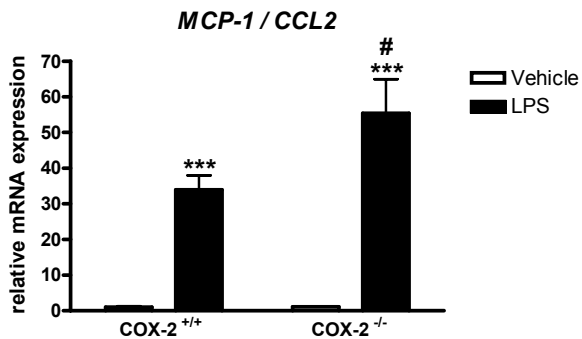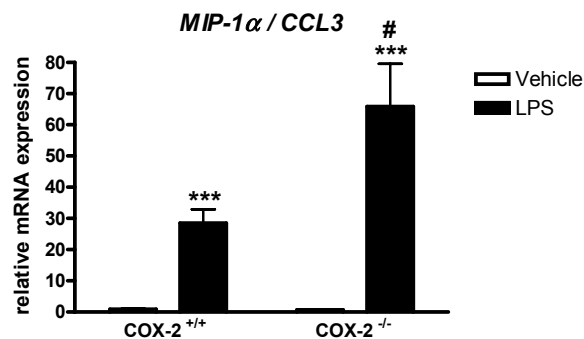

Supplement: MOESM3 [file 9600846]
